# Supplementary material for: Research trends and content analysis of ocean literacy studies between 2017 and 2021
Source: Frontiers journal article supplement (doi:10.3389/fmars.2023.1200181), 2023-10-02
Supplement: Table_1.pdf [file Table_1.pdf]

## *Supplementary Material*

**Table 7. Funding sources in ocean literacy publications between 2017-2021.**

| No | The name of the article                                                                                                                | Funding Source                           |
|----|----------------------------------------------------------------------------------------------------------------------------------------|------------------------------------------|
| 1  | Questions as indicators of ocean literacy: students' online asynchronous discussion with a marine scientist                            | National - international sourced project |
| 2  | Bibliometric analysis of ocean literacy: An underrated term in the scientific literature                                               | National - international sourced project |
| 3  | "Generation Nemo": motivations, satisfaction and career goals of marine biology students                                               | EU Project (Horizon 2020)                |
| 4  | Predictors of coastal stakeholders' knowledge about seawater desalination impacts on marine ecosystems                                 | National - international sourced project |
| 5  | A Change of Mind: Applying Social and Behavioral Research Methods to the Assessment of the Effectiveness of Ocean Literacy Initiatives | EU Project (Horizon 2020)                |
| 6  | The Global Integrated World Ocean Assessment: Linking Observations to Science and Policy Across Multiple Scales                        | National - international sourced project |
| 7  | The Marine CoLAB: Taking a CoLABorative, Values Based Approach to Connect People to the Ocean                                          | National - international sourced project |
| 8  | Social license through citizen science: a tool for marine conservation                                                                 | EU Project (Horizon 2020)                |
| 9  | Collective intelligence for advancing ocean literacy                                                                                   | EU Project (Horizon 2020)                |

|           |                                                                                                                                                  |                                          |
|-----------|--------------------------------------------------------------------------------------------------------------------------------------------------|------------------------------------------|
|           |                                                                                                                                                  |                                          |
| <b>10</b> | Stepping Out of the Ivory Tower for Ocean Literacy                                                                                               | National - international sourced project |
| <b>11</b> | A System Dynamics Approach to Increasing Ocean Literacy                                                                                          | EU Project (Horizon 2020)                |
| <b>12</b> | Ocean Literacy to Mainstream Ecosystem Services Concept in Formal and Informal Education: The Example of Coastal Ecosystems of Southern Portugal | National - international sourced project |
| <b>13</b> | The effects of stakeholder education and capacity building in marine protected areas: A case study from southern Mozambique                      | EU Project (Horizon 2020)                |
| <b>14</b> | Ocean Literacy and Knowledge Transfer Synergies in Support of a Sustainable Blue Economy                                                         | EU Project (Erasmus +)                   |
| <b>15</b> | Building a New Ocean Literacy Approach Based on a Simulated Dive in a Submarine: A Multisensory Workshop to Bring the Deep Sea Closer to People  | National - international sourced project |
| <b>16</b> | An Assessment of Factors Related to Ocean Literacy Based on Gender-Invariance Measurement                                                        | National - international sourced project |
| <b>17</b> | Multilevel Effects of Student and School Factors on Senior High School Students' Ocean Literacy                                                  | National - international sourced project |
| <b>18</b> | A Roadmap for Using the UN Decade of Ocean Science for Sustainable Development in Support of Science, Policy, and Action                         | National - international sourced project |
| <b>19</b> | A game-based education approach for sustainable ocean development                                                                                | National - international sourced project |
| <b>20</b> | Anchoring ocean literacy: participatory iBook design within secondary science classrooms                                                         | EU Project (Horizon 2020)                |

|           |                                                                                                                                                              |                                          |
|-----------|--------------------------------------------------------------------------------------------------------------------------------------------------------------|------------------------------------------|
|           |                                                                                                                                                              |                                          |
| <b>21</b> | Cultural Ecosystem Services Provided by Coralligenous Assemblages and Posidonia oceanica in the Italian Seas                                                 | National - international sourced project |
| <b>22</b> | Cultivating relational values and sustaining socio-ecological production landscapes through ocean literacy: a study on Satoumi                               | National - international sourced project |
| <b>23</b> | Mainstreaming Sustainable Consumption of Seafood Through Enhanced Mandatory Food Labeling                                                                    | National - international sourced project |
| <b>24</b> | The Beginning of Marine Sustainability: Preliminary Results of Measuring Students' Marine Knowledge and Ocean Literacy                                       | National - international sourced project |
| <b>25</b> | The Deep Sea and Me: Using a Science Center Exhibit to Promote Lasting Public Literacy and Elucidate Public Perception of the Deep Sea                       | National - international sourced project |
| <b>26</b> | Connecting to the oceans: supporting ocean literacy and public engagement                                                                                    | National - international sourced project |
| <b>27</b> | Mapping Global Research on Ocean Literacy: Implications for Science, Policy, and the Blue Economy                                                            | EU Project (Erasmus +)                   |
| <b>28</b> | Participatory Monitoring-A Citizen Science Approach for Coastal Environments                                                                                 | National - international sourced project |
| <b>29</b> | Ocean Literacy and Surfing: Understanding How Interactions in Coastal Ecosystems Inform Blue Space User's Awareness of the Ocean                             | National - international sourced project |
| <b>30</b> | Sustainable Biocultural Heritage Management and Communication: The Case of Digital Narrative for UNESCO Marine World Heritage of Outstanding Universal Value | EU Project (Horizon 2020)                |

|           |                                                                                                                                                        |                                                                     |
|-----------|--------------------------------------------------------------------------------------------------------------------------------------------------------|---------------------------------------------------------------------|
| <b>31</b> | Abundance of Environmental Data vs. Low Public Interest in Climate and Ocean Issues. Where Is the Missing Link?                                        | National - international sourced project                            |
| <b>32</b> | Promoting Ocean Literacy in Elementary School Students Through Investigation Activities and Citizen Science                                            | EU Project (Horizon 2020), National - international sourced project |
| <b>33</b> | Tell a Story to Save a River Assessing the Impact of Using a Children's Book in the Classroom as : a Tool to Promote Environmental Awareness           | National - international sourced project                            |
| <b>34</b> | Perception of Citizens Regarding Marine Litter Impacts: Collaborative Methodologies in Island Fishing Communities of Cape Verde                        | National - international sourced project                            |
| <b>35</b> | The Concept of Ocean Sustainability in Formal Education-Comparative Ocean Literacy Coverage Analysis of the Educational Standards of India and the USA | National - international sourced project                            |
| <b>36</b> | University Experiences of Marine Science Research and Outreach Beyond the Classroom                                                                    | National - international sourced project                            |
| <b>37</b> | Marine and coastal ecosystem services on the science-policy-practice nexus: Challenges and opportunities from 11 European case studies                 | EU Project (Horizon 2020)                                           |
| <b>38</b> | A Game for Learning Ocean Literacy: The ResponSEAbLe Project                                                                                           | EU Project (Horizon 2020)                                           |
| <b>39</b> | An environmental education and communication project on migratory fishes and fishing communities                                                       | National - international sourced project                            |
| <b>40</b> | Inland adult and child interest in the ocean                                                                                                           | National - international sourced project                            |
| <b>41</b> | Making ocean literacy inclusive and accessible                                                                                                         | National - international sourced project                            |

|           |                                                                                                |                                          |
|-----------|------------------------------------------------------------------------------------------------|------------------------------------------|
| <b>42</b> | Ocean literacy to promote sustainable development goals and agenda 2030 in coastal communities | National - international sourced project |
| <b>43</b> | Reading over and under the waves: A study of ocean picture books for children                  | National - international sourced project |
| <b>44</b> | Integrated Research for Integrated Ocean Management                                            | National - international sourced project |
